# Supplementary material for: Fall and Rise: Disentangling Cycle Life Trends in Atmospheric Plasma-Synthesized FeOOH/PANI Composite for Conversion Anodes in Lithium-Ion Batteries
Source: Preprints.org preprint supplement (doi:10.20944/preprints202311.1519.v1), 2023-11-24
Supplement: Supplementary file 1 [file supplementary]

# Fall and Rise: Disentangling Cycle Life Trends in Atmospheric Plasma-Synthesized FeOOH/PANI Composite for Conversion Anodes in Lithium-Ion Batteries

Evgenii V. Beletskii <sup>\*1</sup>, Alexey I. Volkov <sup>1</sup>, Ksenia A. Kharisova <sup>1</sup>, Oleg V. Glumov <sup>2</sup>, Maksim A. Kamarou <sup>3</sup>, Daniil A. Lukyanov <sup>1</sup> and Oleg V. Levin <sup>\*1</sup>

<sup>1</sup> Institute of Chemistry, St. Petersburg State University, St. Petersburg, Universitetskaya Emb.7/9, 199034, Russian Federation; a.i.volkov@spbu.ru (A.I.V.); st111412@student.spbu.ru (K.A.K.); lda93@yandex.ru (D.A.L.)

<sup>2</sup> Research Park, St. Petersburg State University, St. Petersburg, Universitetskaya Emb.7/9, 199034, Russian Federation; o.glumov@spbu.ru

<sup>3</sup> Belarusian State Technological University, 220006 Minsk, Republic of Belarus; makkom1995@gmail.com

\* Correspondence: e.beletsky@spbu.ru (E.V.B.); o.levin@spbu.ru (O.V.L.); Tel. +7-(812)-3636000, Ext. 9801

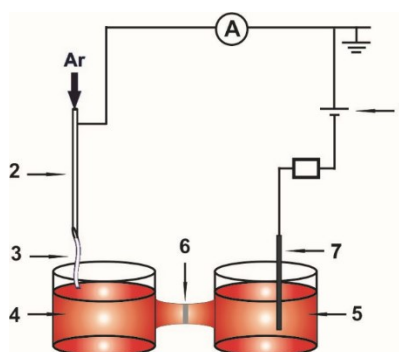

1 – DC power supply, 2 – a stainless steel capillary tube anode, 3 – plasma discharge, 4 – anolyte, 5 – catholyte, 6 – a glass microfiber filter, 7 – stainless steel mesh cathode

**Figure S1.** Synthesis setup diagram

XPS measurements were conducted with photoelectron spectrometer Thermo Fisher Scientific Escalab 250Xi with AlK $\alpha$  radiation (photon energy 1486.6 eV). Spectra were recorded in the constant pass energy mode at 50 eV for element core level spectrum and 100 eV for survey, using XPS 650  $\mu$ m spot size with total energy of 0.2 eV. To counter the surface charge caused by emitting photoelectrons dual mode charge compensation (a combination of low energy electrons and argon) was used. Investigations were conducted at room temperature in an ultrahigh vacuum of the order of 10<sup>-9</sup> mbar. Peaks were fitted with a product of asymmetric Gaussian and Lorentzian lineshape.

XRD powder X-ray diffraction (Bruker D2 Phaser with the following conditions: CoK $\alpha$ 1+2 radiation with 30 kV/10 mA,  $\lambda_{\text{CoK}\alpha 1} = 1.78897 \text{ \AA}$  and  $\lambda_{\text{CoK}\alpha 2} = 1.79285 \text{ \AA}$ , the position sensitive detector, the Bragg-Brentano para-focusing geometry, rotation speed = 20 rpm, range of diffraction angles  $2\theta = (5-75)^\circ$  with a step size of  $0.02^\circ$ , point exposure = 0.5 s, air,  $T = 25^\circ\text{C}$ ).

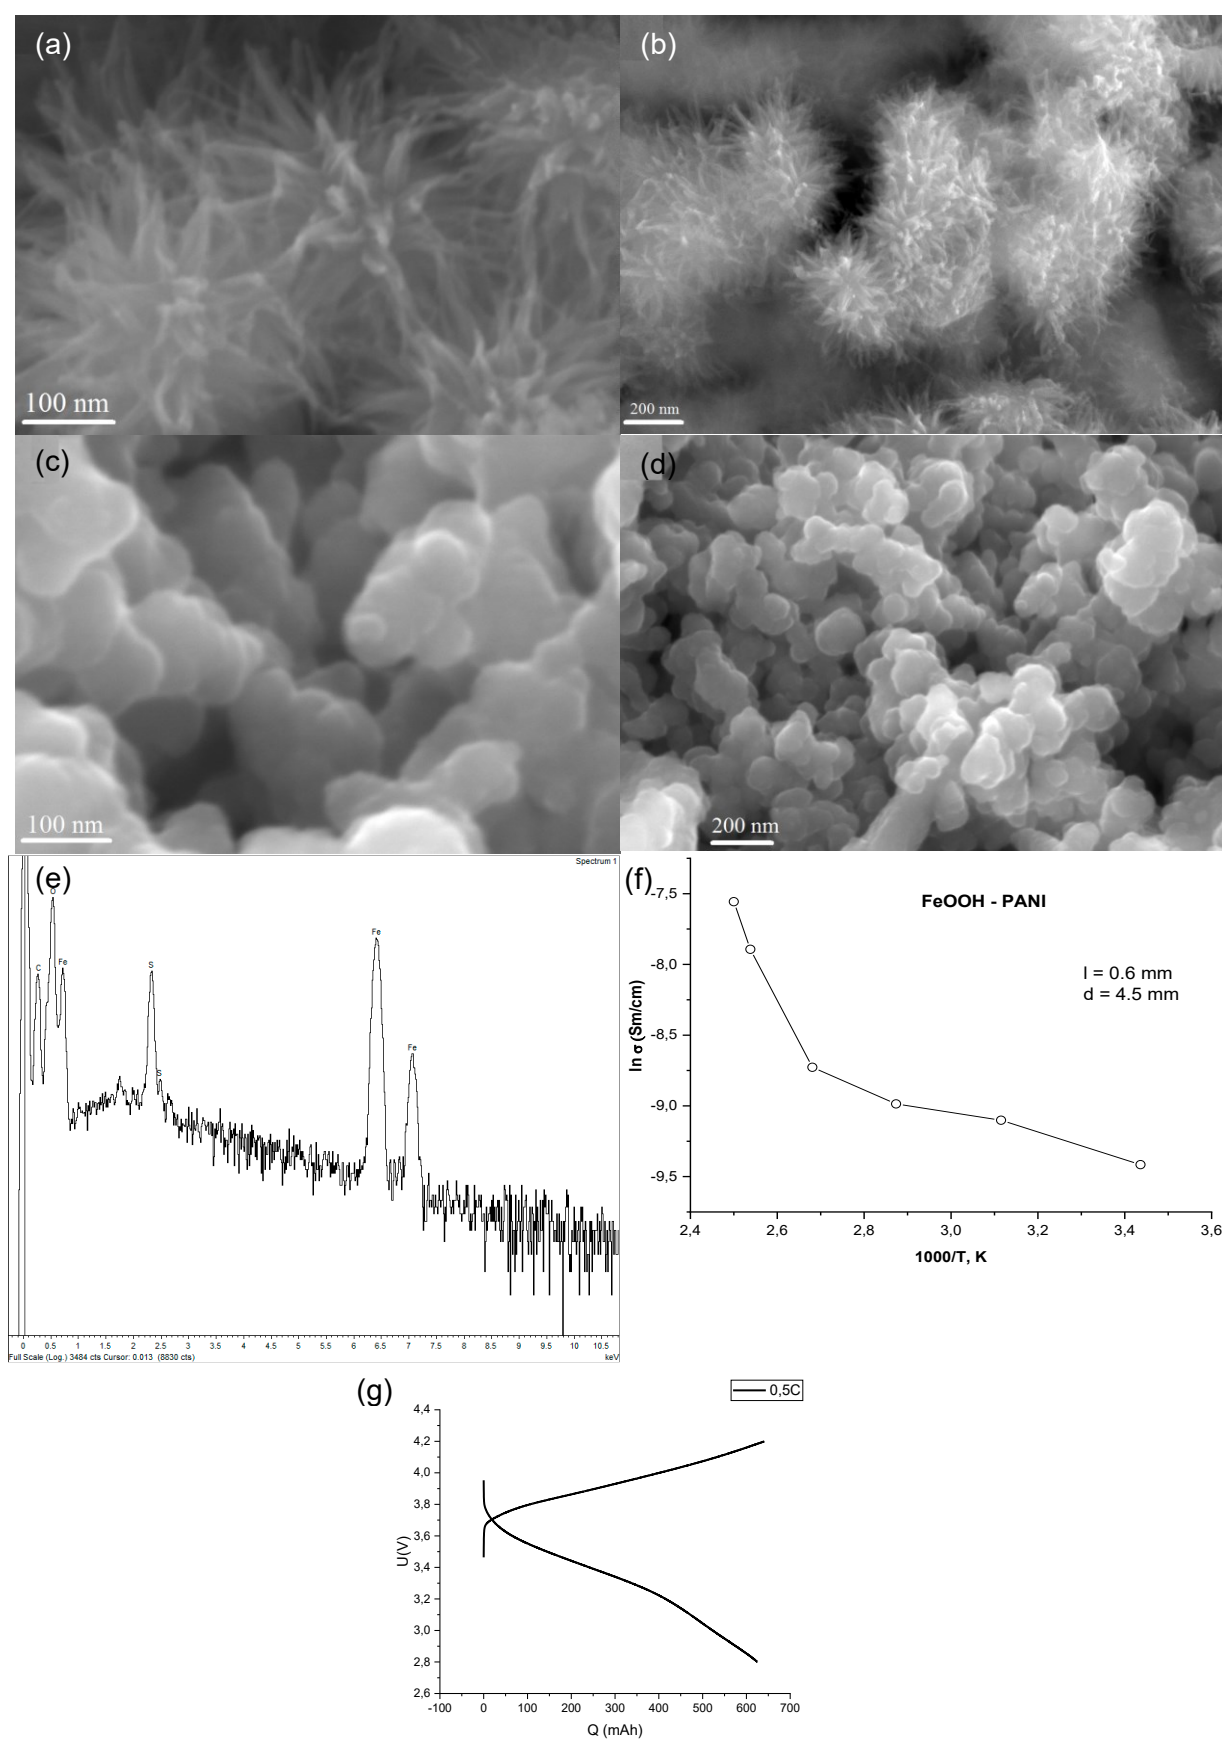

**Figure S2.** SEM images of plasma solution synthesized FeOOH (a, b) and PANI (c,d) nanoparticles; EDX spectra of FeOOH/PANI composite (e); electrical conductivity temperature dependence of FeOOH/PANI composite (f); charge-discharge curve of the NMC532 - Graphite full cell at a C/2 rate (g).

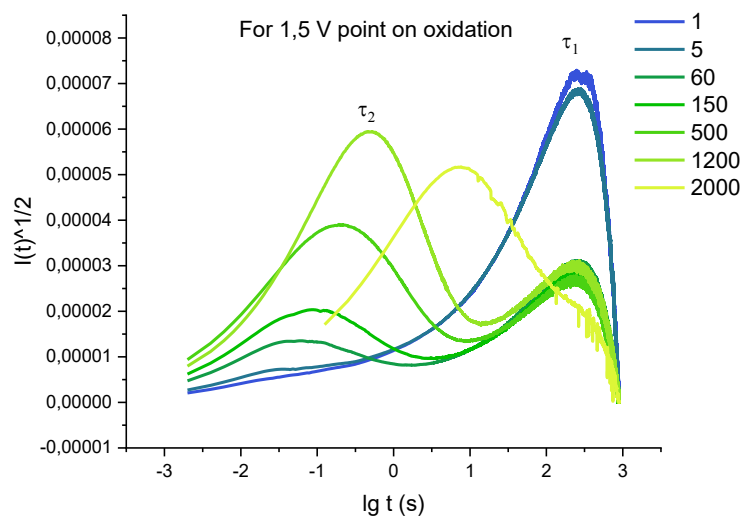

**Figure S3.** Cottrell function plot for the current transient versus the decimal logarithm of time

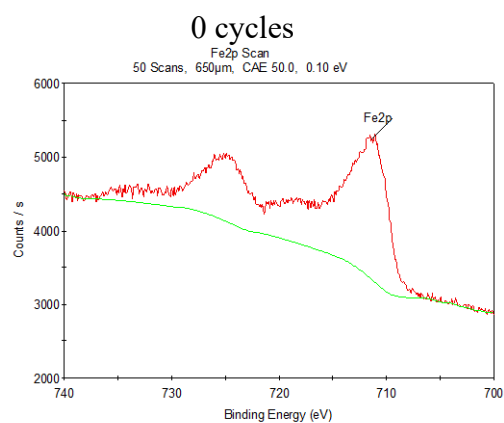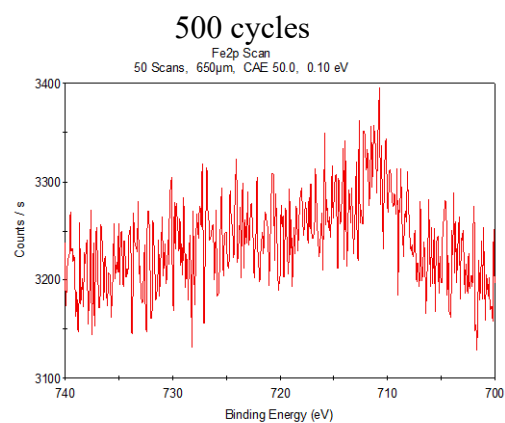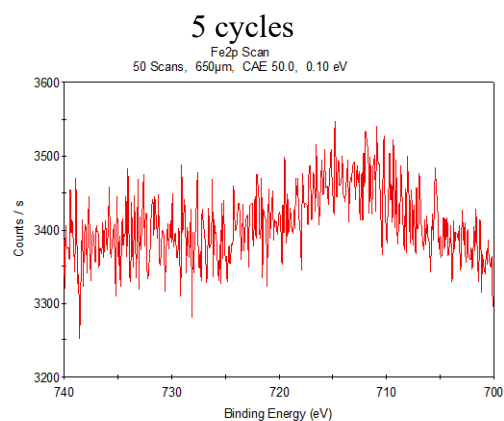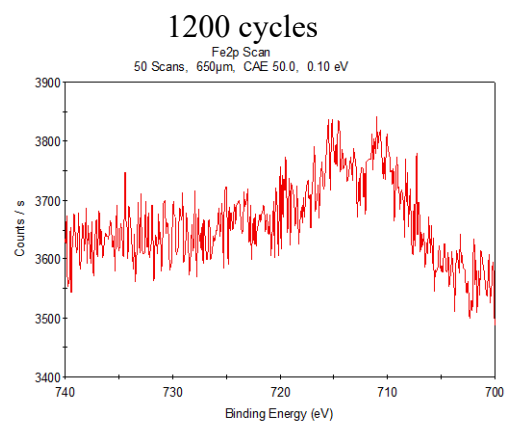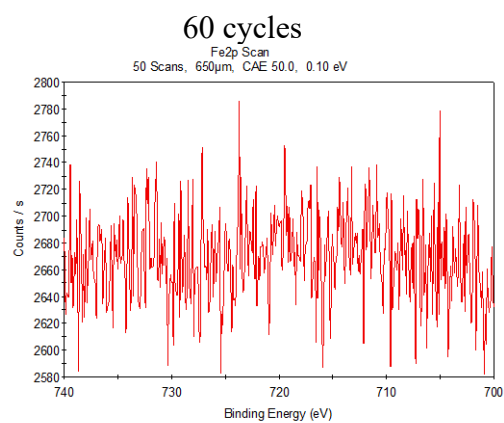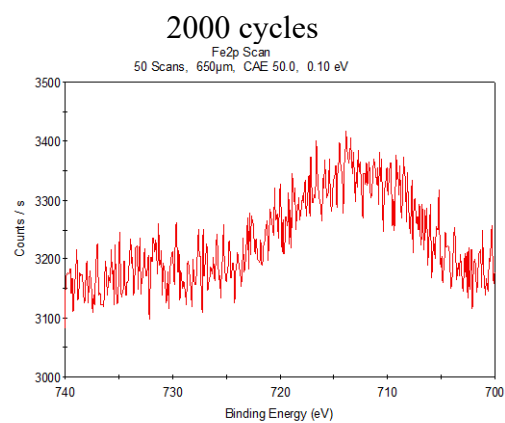

**Figure S4.** XPS spectra of Fe 2p

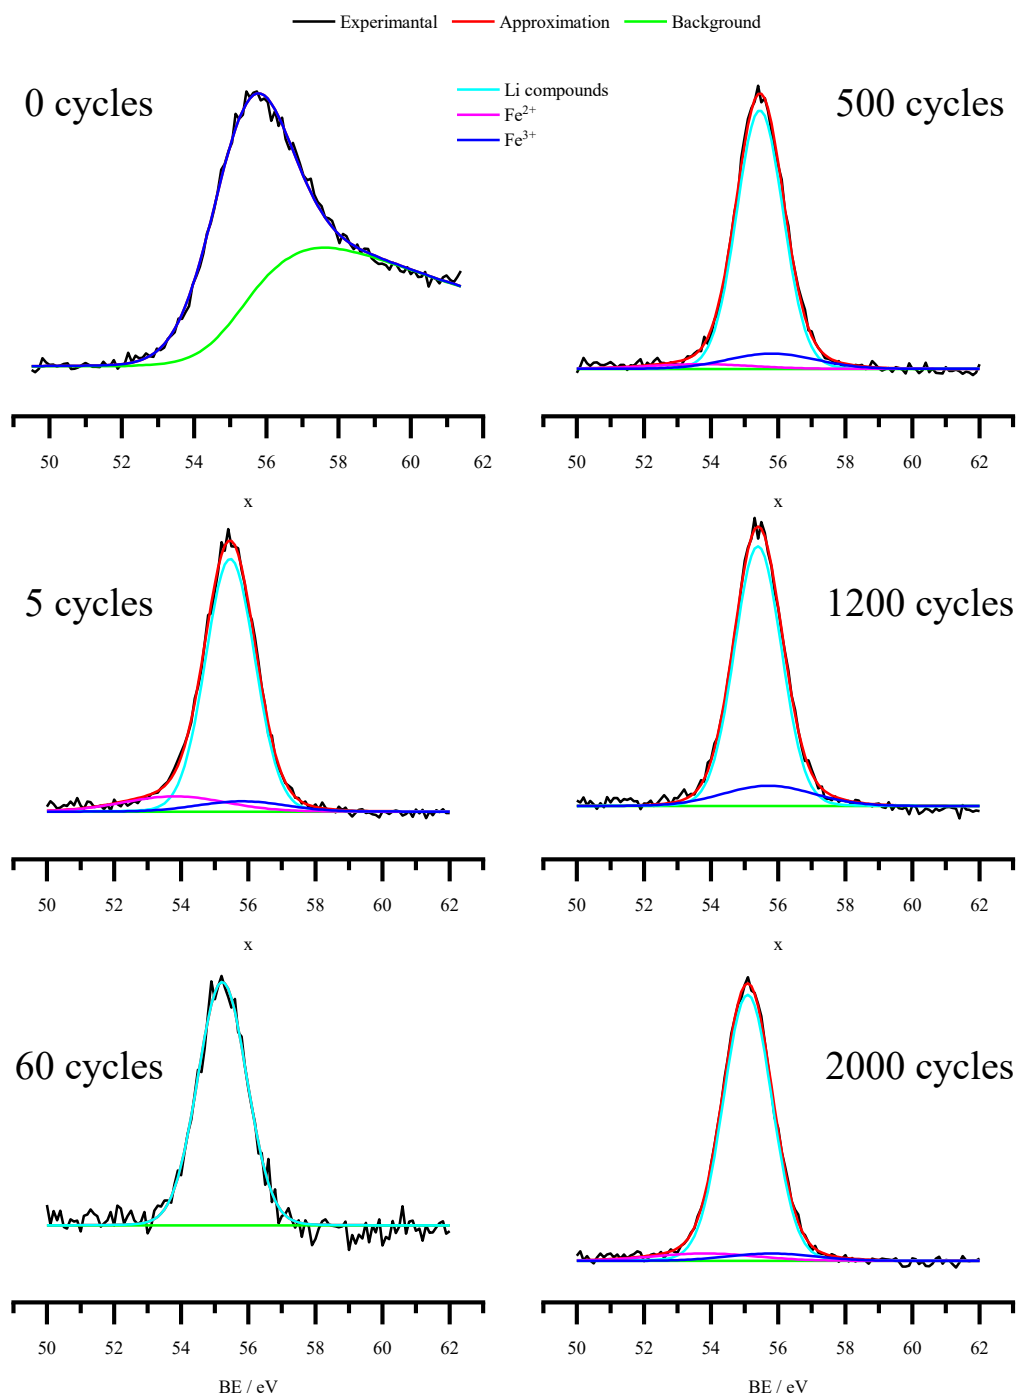

**Figure S5.** XPS spectra of Li 1s + Fe 3p

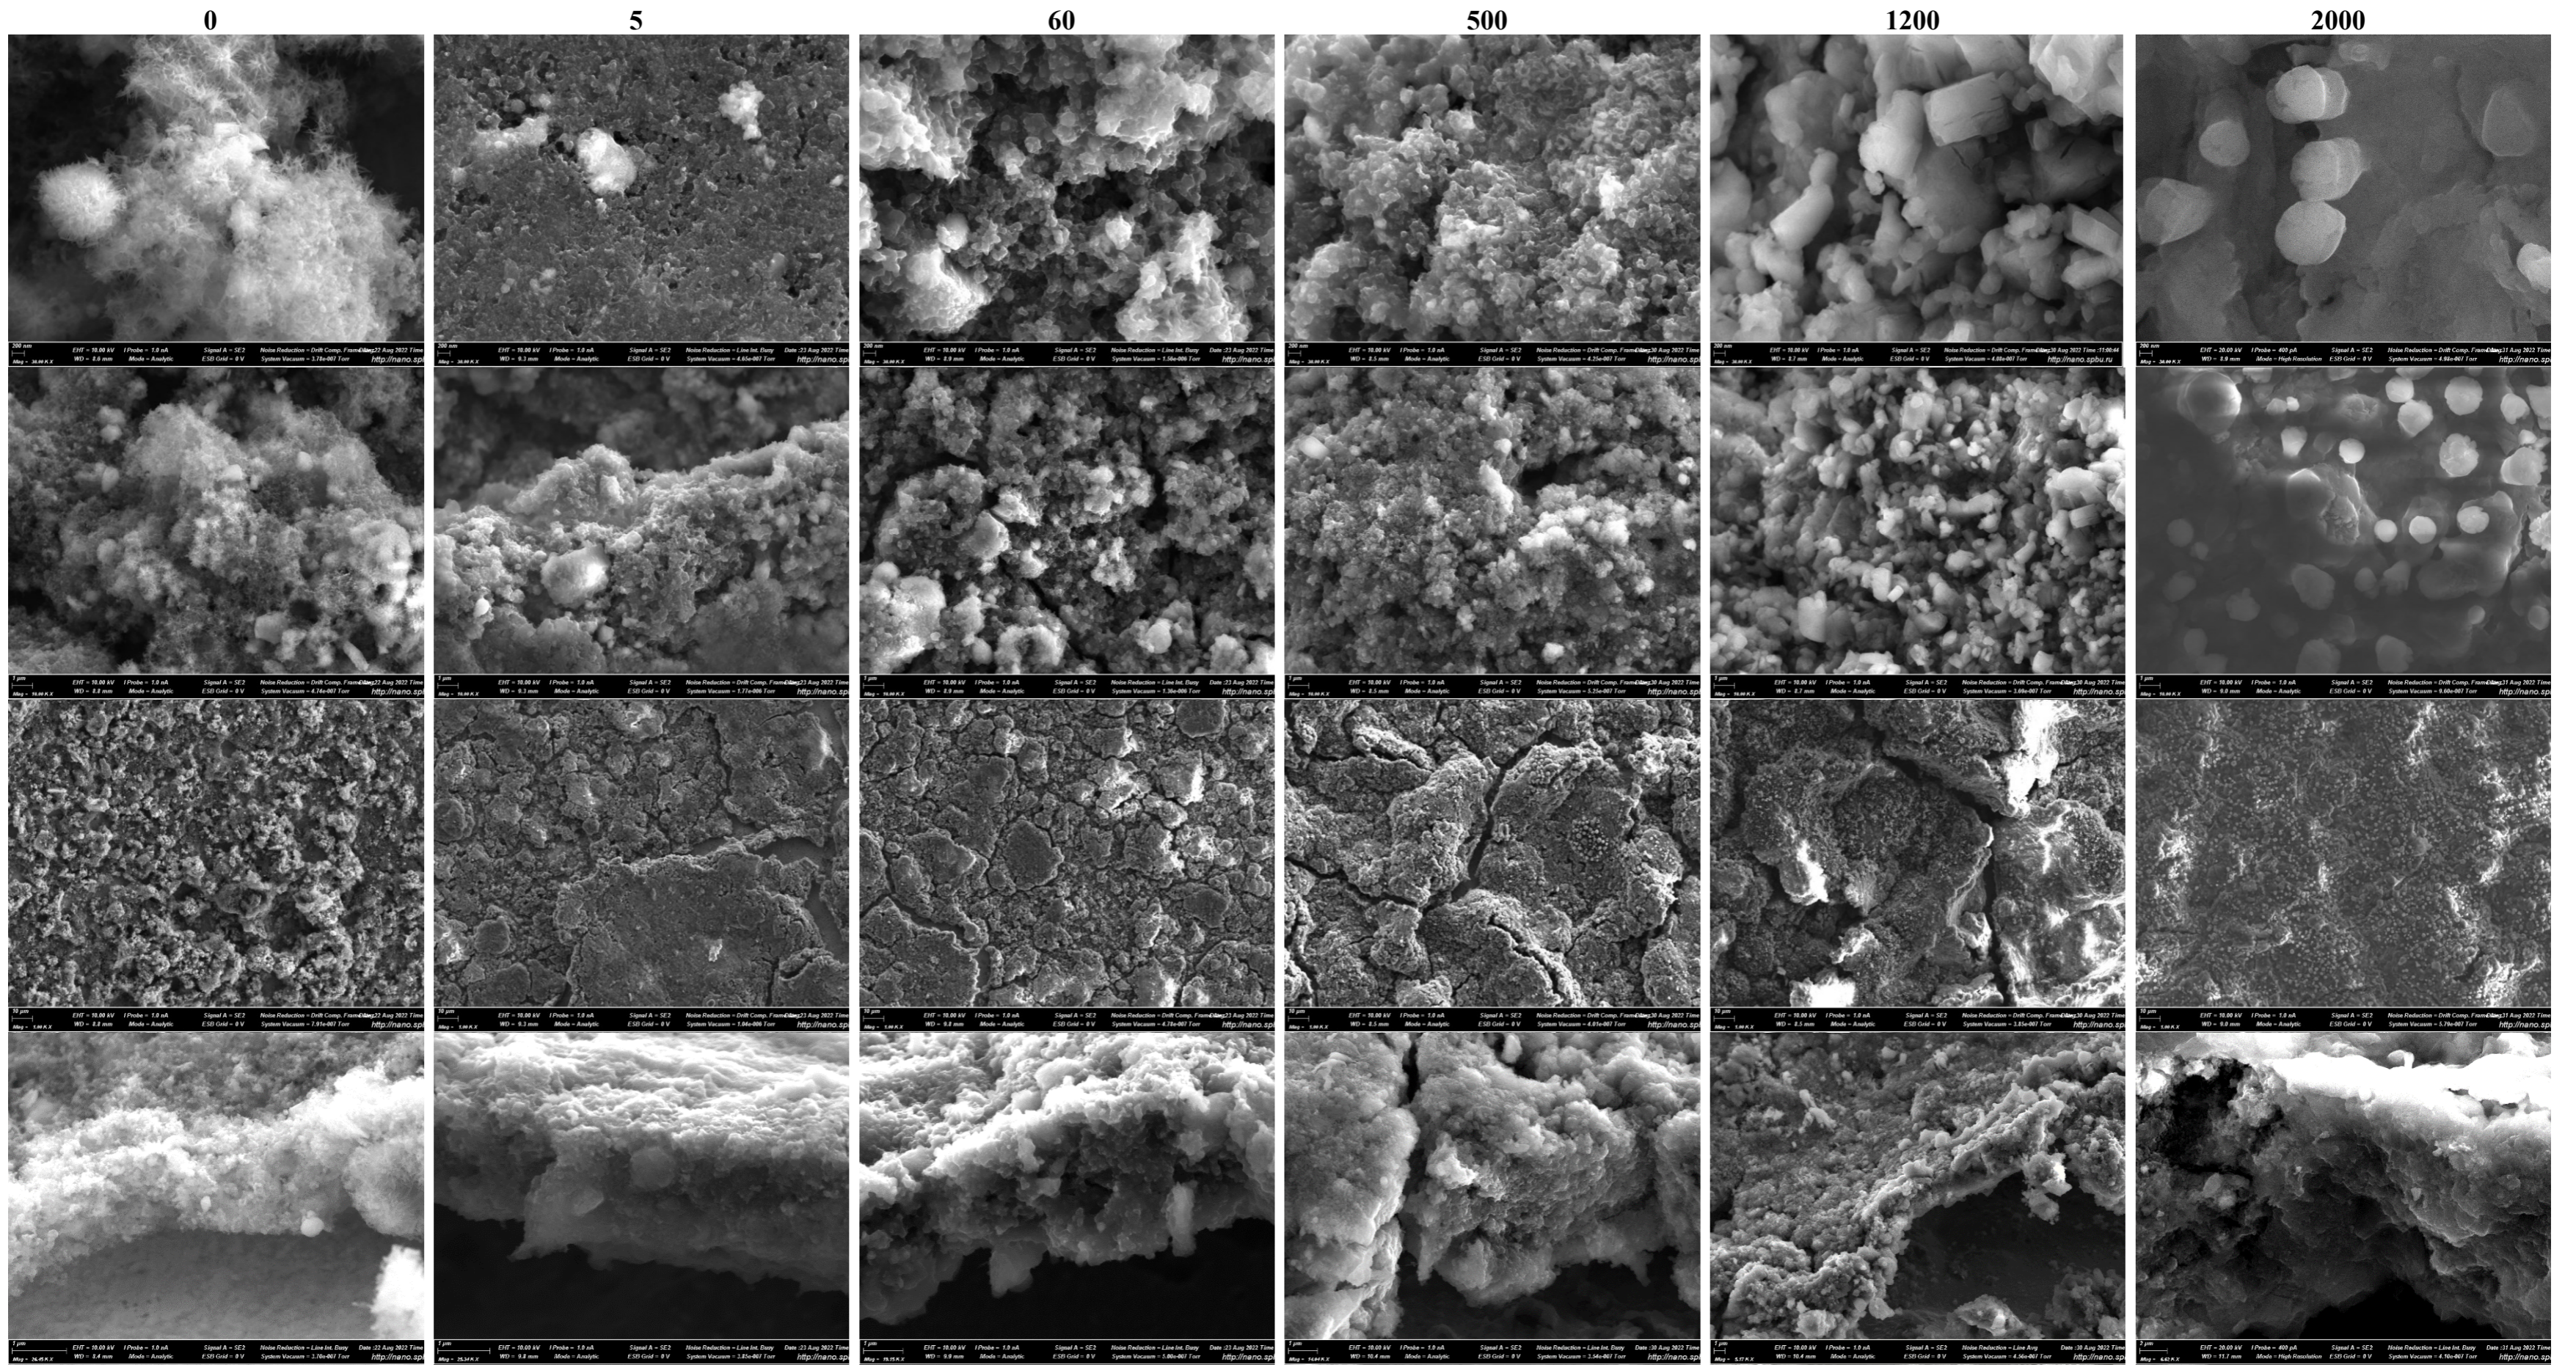

Figure S6. Evolution of the electrode surface during 2000 cycles
